# Supplementary material for: Research on charge-transport properties of TTF–TTP derivatives and organic interfaces
Source: Royal Society of Chemistry journal article supplement (doi:10.1039/c6ra07360c), 2016-01-01
Supplement: c6ra07360c1.pdf [file c6ra07360c1.pdf]

## Research on charge-transport properties of TTF-TTP derivatives and organic interfaces

Table S1. Measured geometric parameters (in Å) and the maximum values of calculated intermolecular transfer integral (in meV) for compound 1-6

| Compound | d(C=C) | d(S-S) | d(min) | d(cen) | d(S <sup>1</sup> -S) | $V_{hole}(\text{max})$ | $V_{elec}(\text{max})$ |
|----------|--------|--------|--------|--------|----------------------|------------------------|------------------------|
| 1        | 1.35   | 3.24   | 4.15   | 7.41   | 5.03                 | 107.64                 | 11.19                  |
| 2        | 1.34   | 3.22   | 3.77   | 4.11   | 4.11                 | 64.46                  | 24.81                  |
| 3        | 1.31   | 3.17   | 3.76   | 4.63   | 5.99                 | 80.46                  | 26.69                  |
| 4        | 1.35   | 3.23   | 3.76   | 6.11   | 4.00                 | 75.52                  | 92.99                  |
| 5        | 1.33   | 3.23   | 3.82   | 6.14   | 4.04                 | 75.36                  | 33.25                  |
| 6        | 1.35   | 3.23   | 3.72   | 6.32   | 4.09                 | 49.99                  | 33.25                  |

Table S2 Measured geometric parameters (in Å) and the maximum values of calculated intermolecular transfer integral (in meV) for compound 7-12

| Compound | d(C=C) | d(S-S) | d(min) | $\theta$ | d(cen) | d(S <sub>1</sub> -S) | $V_{hole}(\text{max})$ | $V_{elec}(\text{max})$ |
|----------|--------|--------|--------|----------|--------|----------------------|------------------------|------------------------|
| 7        | 1.348  | 3.21   | 3.497  | 68.687   | 3.854  | 4.728                | 61.697                 | 57.30035               |
| 8        | 1.348  | 3.189  | 3.742  | 79.244   | 3.855  | 3.855                | 29.737                 | 99.4274                |
| 9        | 1.334  | 3.187  | 3.452  |          | 10.87  | 7.412                | 40.691                 | 12.37225               |
| 10       | 1.443  |        | 3.818  | 65.128   | 4.732  | 3.746                | 16.221                 | 36.70412               |
| 11       | 1.335  | 3.216  | 3.578  |          | 4.624  | 4.624                | 69.064                 | 18.93624               |
| 12       | 1.339  | 3.21   | 3.351  | 77.425   | 6.093  | 3.758                | 16.666                 | 14.96019               |

Table S3 Measured geometric parameters (in Å) and the maximum values of calculated intermolecular transfer integral (in meV) for compound 13-17

| Compound | d(C=C) | d(S-S) | d(min) | d(cen) | d(S <sup>1</sup> -S) | $V_{hole}(\text{max})$ | $V_{elec}(\text{max})$ |
|----------|--------|--------|--------|--------|----------------------|------------------------|------------------------|
| 13       | 1.34   | 3.252  | 3.78   | 6      | 4.972                | 22.                    | 0.67                   |
| 14       | 1.345  | 3.171  | 3.763  | 6.166  | 4.541                | 69.58                  | 25.69                  |
| 15       | 1.327  | 3.338  | 3.672  | 9.916  | 5.358                | 5.70                   | 17.72                  |
| 16       | 1.344  | 3.215  | 6.355  | 8.443  | 7.934                | 17.21                  | 3.18                   |
| 17       | 1.343  | 3.313  | 3.609  | 5.422  | 3.784                | 30.41                  | 23.91                  |

Table S4 Measured geometric parameters (in Å) and the maximum values of calculated intermolecular transfer integral (in meV) for compound 18 and 19

| Compound | d(C=C) | d(S-S) | d(min) | d(cen) | d(S <sup>1</sup> -S) | $V_{hole}(\text{max})$ | $V_{elec}(\text{max})$ |
|----------|--------|--------|--------|--------|----------------------|------------------------|------------------------|
| 18       | 1.341  | 3.071  | 4.52   | 5.216  | 5.216                | 43.40                  | 37.40                  |
| 19       | 1.343  | 3.066  | 3.628  | 6.116  | 4.037                | 99.22                  | 37.40                  |

Table S5. Calculated HOMOs, LUMOs, HOMO-LUMO gaps, reorganization energies

( $\lambda_{\text{hole}}$  and  $\lambda_{\text{ele}}$ ), IPs and EAs for TTF derivatives using B3LYP/6-31 G(d) (in eV)

| Compound | HOMO  | LUMO  | H-L gap | $\lambda_{\text{hole}}$ | $\lambda_{\text{ele}}$ | EA    | IP   |
|----------|-------|-------|---------|-------------------------|------------------------|-------|------|
| 1        | -4.32 | -0.72 | 3.60    | 0.28                    | 0.45                   | 0.59  | 5.76 |
| 2        | -4.81 | -1.24 | 3.57    | 0.23                    | 0.14                   | -0.23 | 6.03 |
| 3        | -4.68 | -1.13 | 3.54    | 0.25                    | 0.23                   | -1.42 | 6.74 |
| 4        | -4.26 | -0.69 | 3.57    | 0.24                    | 0.20                   | -1.69 | 6.84 |
| 5        | -4.27 | -0.68 | 3.59    | 0.27                    | 0.44                   | 0.57  | 5.65 |
| 6        | -4.25 | -0.68 | 3.57    | 0.16                    | 0.47                   | -3.19 | 6.54 |
| 7        | -4.83 | -1.32 | 3.51    | 0.30                    | 0.48                   | 0.04  | 6.22 |
| 8        | -5.58 | -2.52 | 3.06    | 0.32                    | 0.69                   | -0.29 | 6.03 |
| 9        | -5.73 | -2.74 | 2.99    | 0.42                    | 0.27                   | -1.43 | 6.57 |
| 10       | -5.35 | -2.83 | 2.47    | 0.18                    | 0.63                   | 0.69  | 6.03 |
| 11       | -5.49 | -2.46 | 3.04    | 0.31                    | 0.71                   | 0.77  | 6.14 |
| 12       | -4.32 | -0.96 | 3.36    | 0.28                    | 0.45                   | 0.58  | 5.66 |
| 13       | -5.01 | -1.93 | 3.08    | 0.27                    | 0.44                   | 0.58  | 5.63 |
| 14       | -5.44 | -2.60 | 2.84    | 0.29                    | 0.47                   | 0.18  | 5.53 |
| 15       | -5.29 | -2.35 | 2.94    | 0.52                    | 0.54                   | -1.52 | 6.56 |
| 16       | -5.47 | -2.65 | 2.82    | 0.52                    | 0.90                   | -1.08 | 6.20 |
| 17       | -5.42 | -2.57 | 2.85    | 0.31                    | 0.79                   | -2.52 | 4.57 |
| 18       | -4.62 | -0.50 | 4.12    | 0.51                    | 0.53                   | -1.61 | 6.56 |
| 19       | -4.74 | -0.45 | 4.29    | 0.54                    | 0.55                   | -1.55 | 6.53 |

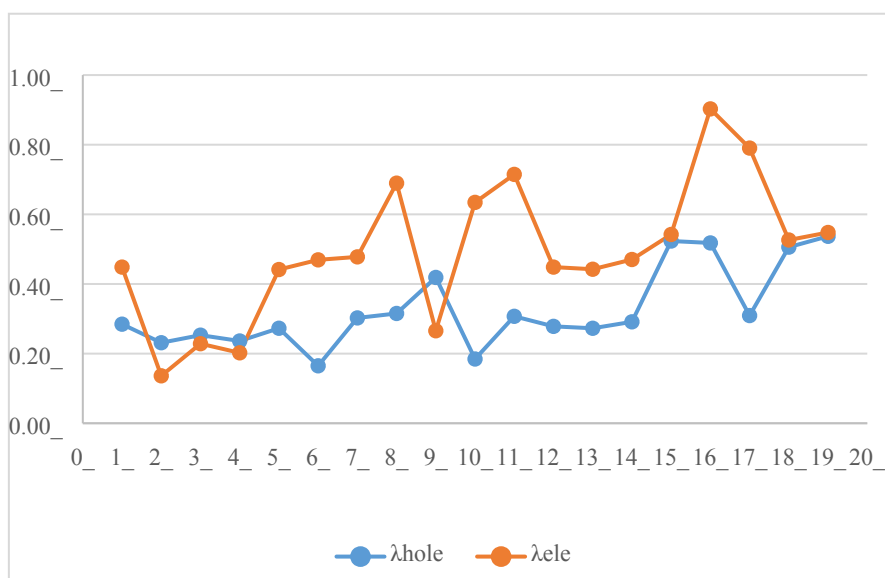

Figure S1. Reorganization energies for all compounds

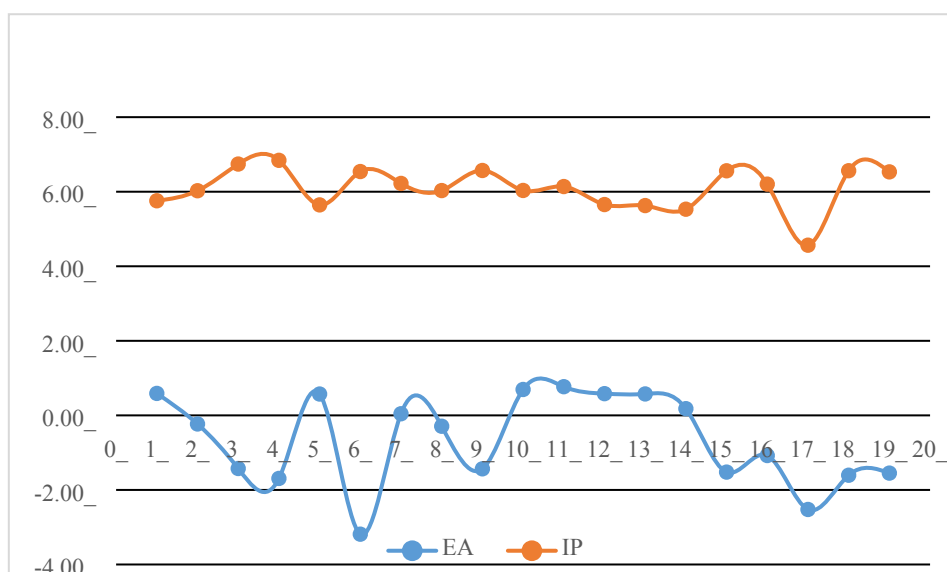

Figure S2. Calculated energies of EA and IP for all compounds

Table S6. Simulated maximum charge transfer mobilities for all compounds 1-19

|          | 1     | 2     | 3                      | 4     | 5                     | 6     | 7     | 8     | 9                     | 10                    |
|----------|-------|-------|------------------------|-------|-----------------------|-------|-------|-------|-----------------------|-----------------------|
| <b>E</b> | 0.002 | 0.004 | $6.92 \times 10^{-12}$ | 0.190 | 0.846                 | 0.020 | 1.709 | 1.090 | 0.058                 | $4.03 \times 10^{-5}$ |
| <b>H</b> | 1.821 | 0.338 | 0.370                  | 0.606 | 0.024                 | 0.451 | 0.658 | 0.168 | 0.414                 | 0.096                 |
|          | 11    | 12    | 13                     | 14    | 15                    | 16    | 17    | 18    | 19                    |                       |
| <b>E</b> | 0.046 | 0.004 | 0.000                  | 0.024 | $4.73 \times 10^{-4}$ | 0.148 | 0.003 | 0.003 | $1.03 \times 10^{-4}$ |                       |
| <b>H</b> | 0.094 | 0.035 | 0.006                  | 0.902 | 0.008                 | 0.006 | 0.005 | 0.670 | 0.950                 |                       |
